# Supplementary material for: Fast, parallel implementation of particle filtering on the GPU architecture
Source: Springer Nature journal article supplement (doi:10.1186/1687-6180-2013-148), 2013-09-21

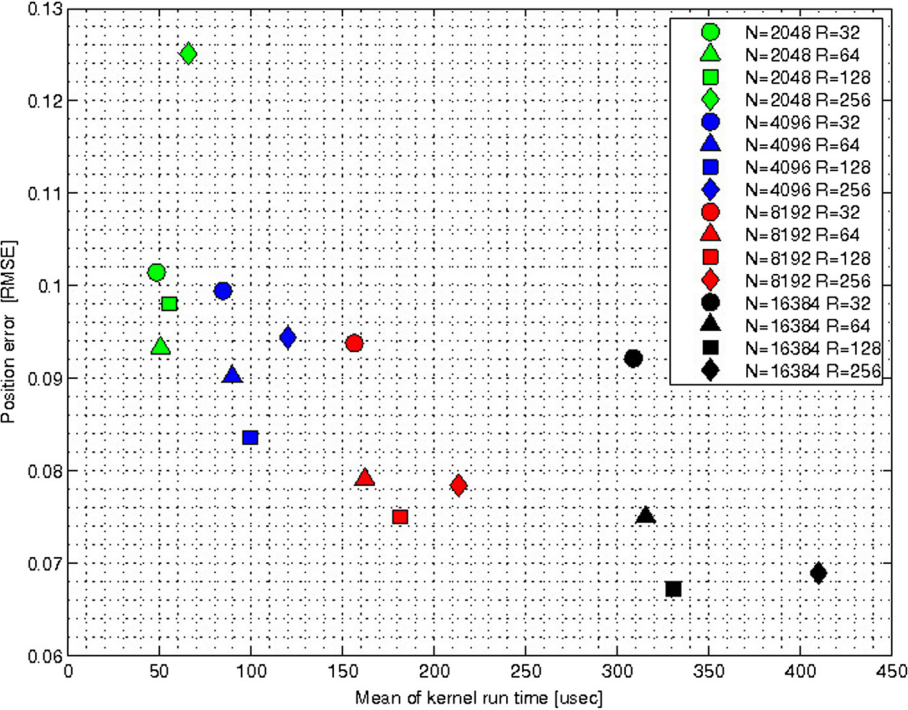

Supplement: 13634_2013_544_MOESM11_ESM.pdf [file 13634_2013_544_MOESM11_ESM.pdf]
